# Supplementary material for: A hypoperfusion context may aid to interpret hyperlactatemia in sepsis-3 septic shock patients: a proof-of-concept study
Source: Springer Nature journal article supplement (doi:10.1186/s13613-017-0253-x), 2017-03-08

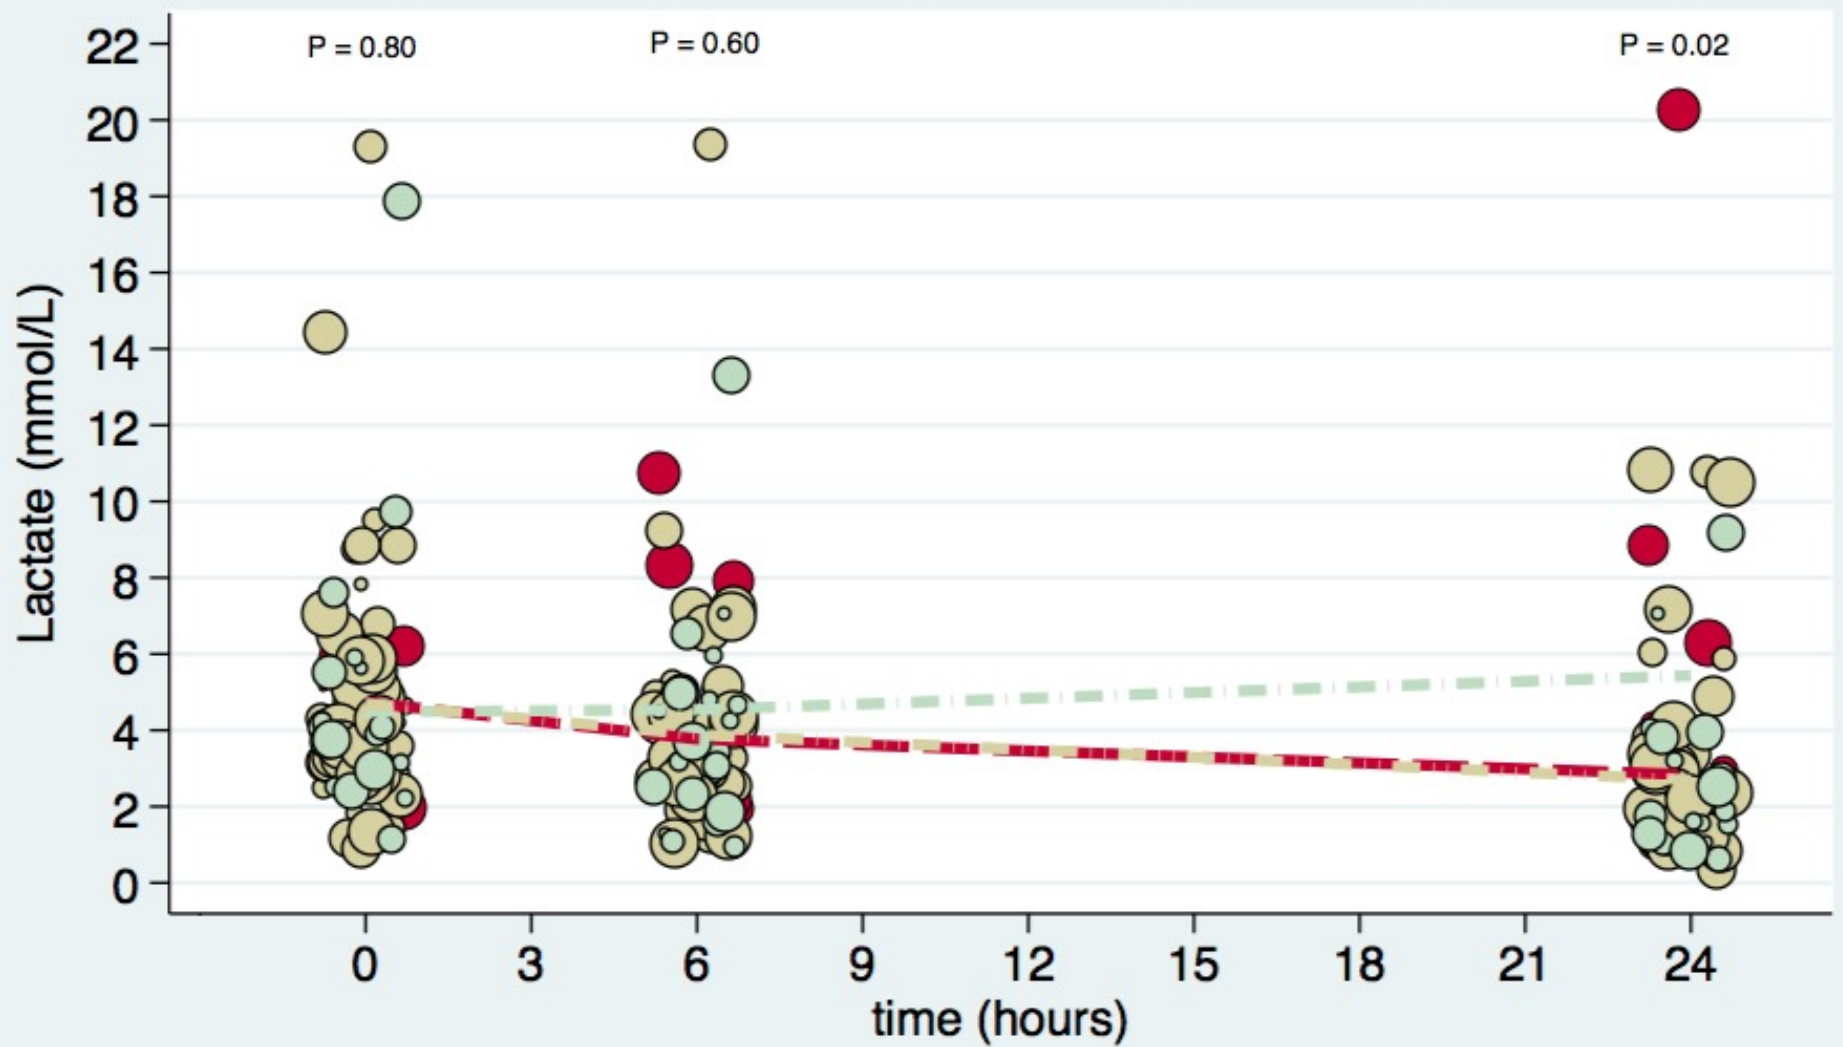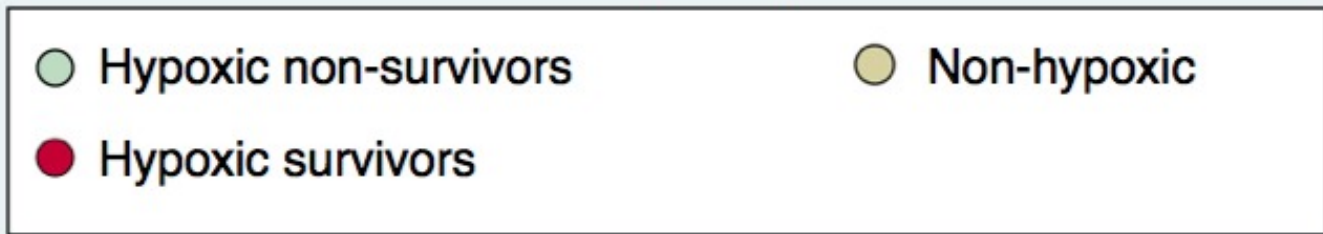

Supplement: MOESM1 [file 12129300]
